# Supplementary material
Source: publisher figshare collection journal article supplement (https://karger.figshare.com/articles/dataset/_/6222002)
Supplement: Supplementary file 1 [file 1]

**Table S2 Sequences of the primer pairs used in this study.**

| Target gene    | Primer name                  | Primer sequence (5'-3')                                                                                               |
|----------------|------------------------------|-----------------------------------------------------------------------------------------------------------------------|
| <b>SCO6196</b> | FadD-F-KasO*-RBS-            | GTCAGGATCCTGTTTCACATTCGAACCGTCTCTGCTTTGACAACATGCTGTGCGGTGTTGTAAAGTCGTGGCCAAACTACGAA                                   |
|                | BamHI                        | GGGGAGTCAGTAGTGACCGCACCCGCGCCCCAG                                                                                     |
|                | FadD-R-EcoRI                 | GTCAGAATTCTCAGGGGCGCGCTCCGTACCG                                                                                       |
| <b>SCO3051</b> | FadE-F-RBS-HindIII           | GTCAAAGCTTA <del>AACTACGAAGGGGAGTCAGT</del> ATTGGCCGGATCGGCTGACTTCG                                                   |
|                | FadE-R-T <sub>fd</sub> -NdeI | GTCACATATGCGAAAGCAAGCTGATAAACCGATACAATTAAAGGCTCCTTTTGGAGCCTTTTTTTTTTGGAGATTTTCAACGT<br>GAAAAAATCAATCGGTCGCGACGAGCGAGG |
| <b>FadD</b>    | FadD-F (for qPCR)            | CGGCTCTTGGAGTGGCAGAA                                                                                                  |
|                | FadD-R (for qPCR)            | GGAGGAACGGCTACCACAGG                                                                                                  |
| <b>FadE</b>    | FadE-F (for qPCR)            | GGCCGCTCAGAAGTCGGTAC                                                                                                  |
|                | FadE-R (for qPCR)            | GCTGCTGGATCTCGTTCGTG                                                                                                  |
| <b>FadA</b>    | FadA-F (for qPCR)            | GGCAAGGCAGACCTGAGCAT                                                                                                  |
|                | FadA-R (for qPCR)            | GTCGTGACTCACGCCGAATT                                                                                                  |
| <b>FadB</b>    | FadB-F (for qPCR)            | GCGTCATCAGCACGTTCTC                                                                                                   |
|                | FadB-R (for qPCR)            | AGCGTCAGGGTCAGCTCGTC                                                                                                  |
| <b>AccB</b>    | AccB-F (for qPCR)            | TTGACGTGCCGGACATCCAC                                                                                                  |
|                | AccB-R (for qPCR)            | GGCGGTGTTCTTGCCCTTCG                                                                                                  |
| <b>FabH</b>    | FabH-F (for qPCR)            | AGCAGTCCTCCGTCGCTGTC                                                                                                  |
|                | FabH-R (for qPCR)            | GTCGTGGATGGTGGCGTGTA                                                                                                  |
| <b>FabI</b>    | FabI-F (for qPCR)            | GATGGCGGCCAAGTCGATCC                                                                                                  |
|                | FabI-R (for qPCR)            | GCAGCCAGTCCGACAGCACC                                                                                                  |
