# Supplementary material
Source: publisher figshare collection journal article supplement (https://karger.figshare.com/articles/dataset/_/6222002)
Supplement: Supplementary file 2 [file 1]

**Table S1 Changes of fatty acids ( $\mu\text{mol/ml}$ ) availability during fermentations of the strains ASAGF73 and ASAGF46 with various oils.**

| Strain  | Oil        | Time (d) | C16: 0               | Cont.   | C18:0               | Cont.  | C18:1                  | Cont.   | C18:2                | Cont.   | C20:0                | Cont.   | Total Cont. |
|---------|------------|----------|----------------------|---------|---------------------|--------|------------------------|---------|----------------------|---------|----------------------|---------|-------------|
| ASAGF73 | Soybean    | 0        | 115.637 $\pm$ 11.977 | 76.717  | 69.002 $\pm$ 8.300  | 34.402 | 423.757 $\pm$ 34.852   | 149.478 | 974.612 $\pm$ 76.937 | 311.504 | 137.108 $\pm$ 10.898 | 60.121  | 632.222     |
|         |            | 7        | 38.920 $\pm$ 3.380   | (12.1%) | 34.600 $\pm$ 3.6170 | (5.4%) | 274.279 $\pm$ 13.490   | (23.6%) | 663.108 $\pm$ 30.384 | (49.3%) | 76.987 $\pm$ 8.321   | (9.6%)  |             |
|         | Strawberry | 0        | 101.718 $\pm$ 14.189 | 75.826  | -                   | -      | 572.694 $\pm$ 60.671   | 381.12  | 553.755 $\pm$ 53.125 | 301.78  | -                    | -       | 758.726     |
|         |            | 7        | 25.892 $\pm$ 1.384   | (10%)   | -                   | -      | 191.574 $\pm$ 13.741   | (50.2%) | 251.975 $\pm$ 8.239  | (39.8%) | -                    | -       |             |
|         | Camellia   | 0        | 85.731 $\pm$ 1.747   | 57.675  | -                   | -      | 1183.358 $\pm$ 193.664 | 719.731 | 249.136 $\pm$ 2.662  | 129.933 | -                    | -       | 907.339     |
|         |            | 7        | 28.056 $\pm$ 1.040   | (6.3%)  | -                   | -      | 463.327 $\pm$ 22.496   | (79.3%) | 119.203 $\pm$ 3.092  | (14.3%) | -                    | -       |             |
| ASAGF46 | Soybean    | 0        | 125.239 $\pm$ 8.169  | 84.334  | 76.290 $\pm$ 4.623  | 48.552 | 473.884 $\pm$ 40.168   | 207.84  | 892.683 $\pm$ 78.937 | 339.002 | 149.526 $\pm$ 12.332 | 75.4    | 755.128     |
|         |            | 7        | 40.905 $\pm$ 3.9776  | (11.2%) | 27.738 $\pm$ 3.937  | (6.4%) | 266.044 $\pm$ 25.782   | (27.5%) | 553.681 $\pm$ 66.545 | (44.9%) | 74.1275 $\pm$ 5.349  | (10.0%) |             |
|         | Strawberry | 0        | 129.837 $\pm$ 13.582 | 98.616  | -                   | -      | 516.463 $\pm$ 64.032   | 400.314 | 491.028 $\pm$ 55.602 | 359.622 | -                    | -       | 858.553     |
|         |            | 7        | 31.221 $\pm$ 2.324   | (11.5%) | -                   | -      | 116.149 $\pm$ 12.856   | (46.6%) | 131.406 $\pm$ 15.387 | (41.9%) | -                    | -       |             |
|         | Camellia   | 0        | 85.343 $\pm$ 5.797   | 64.288  | -                   | -      | 1389.277 $\pm$ 84.642  | 764.321 | 242.385 $\pm$ 21.060 | 139.419 | -                    | -       | 968.028     |
|         |            | 7        | 21.055 $\pm$ 1.811   | (6.6%)  | -                   | -      | 624.956 $\pm$ 57.778   | (79.0%) | 102.966 $\pm$ 8.368  | (14.4%) | -                    | -       |             |

Cont.: fatty acid consumption and the proportion in the total amount of consumption; -: not concerned; The GC analysis was repeated three times for each sample.
